# Supplementary material for: Generation, characterization and structural data of chymase binding proteins based on the human Fyn kinase SH3 domain
Source: PubMed Central journal article supplement — MAbs. 2012 Jul 1;4(4):497–508. doi: 10.4161/mabs.20452 (PMC3499344; doi:10.4161/mabs.20452), 2012-07-01
Supplement: mabs-4-497-s01.pdf [file mabs-4-497-s01.pdf]

Supplemental Material to:

Daniel Schlatter, Simon Brack, David W. Banner, Sarah Batey, Jörg Benz, Julian Bertschinger, et al. Generation, characterization and structural data of chymase-binding proteins based on the human Fyn kinase SH3 domain. *mAbs* 2012; 4(4); <http://dx.doi.org/10.4161/mabs.20452>  
<http://www.landesbioscience.com/journals/mabs/article/20452/>

## Supplementary Materials and Methods

| Dataset                               | 1                                             | 2                                | 3                                             | 4                                          | 5                                             | 6                                             |
|---------------------------------------|-----------------------------------------------|----------------------------------|-----------------------------------------------|--------------------------------------------|-----------------------------------------------|-----------------------------------------------|
| PDB accession code                    | 4afq                                          | 4afs                             | 4afu                                          | 4afz                                       | 4ag1                                          | 4ag2                                          |
| Fynomer                               | 4C_A4                                         | 4C_A4                            | 4C_A4                                         | 4C_E4                                      | 4C_E4                                         | 3C_B5                                         |
| Data collection                       | 50.0-1.51                                     | 50.0-1.75                        | 50.0-1.82                                     | 50.0-2.19                                  | 50.0-1.40                                     | 50.0-1.78                                     |
| Resolution range (Å) <sup>1</sup>     | (1.61-1.51)                                   | (1.84-1.75)                      | (1.91-1.82)                                   | (2.28-2.19)                                | (1.49-1.40)                                   | (1.87-1.78)                                   |
| Space group                           | P2 <sub>1</sub> 2 <sub>1</sub> 2 <sub>1</sub> | P2 <sub>1</sub> 2 <sub>1</sub> 2 | P2 <sub>1</sub> 2 <sub>1</sub> 2 <sub>1</sub> | P2 <sub>1</sub>                            | P2 <sub>1</sub> 2 <sub>1</sub> 2 <sub>1</sub> | P2 <sub>1</sub> 2 <sub>1</sub> 2 <sub>1</sub> |
| Cell dimensions (Å/°)                 | a=59.63,<br>b=92.79,<br>c=116.26              | a=78.58,<br>b=89.07,<br>c=48.49  | a=58.99,<br>b=59.06,<br>c=158.1               | a=60.27,<br>b=58.34,<br>c=93.03<br>β=103.8 | a=59.00,<br>b=59.85,<br>c=89.71               | a=56.94,<br>b=64.12,<br>c=175.0               |
| Unique reflections                    | 101765<br>(17578)                             | 35077<br>(4764)                  | 50464<br>(6690)                               | 32077<br>(3262)                            | 63158<br>(10573)                              | 62210<br>(8333)                               |
| # complexes / a.u.                    | 2                                             | 1                                | 2                                             | 2                                          | 1                                             | 2                                             |
| Multiplicity                          | 6.64 (6.50)                                   | 6.43 (6.35)                      | 6.13 (5.48)                                   | 3.38 (3.16)                                | 6.54 (6.62)                                   | 6.19 (5.62)                                   |
| Completeness (%)                      | 99.9 (99.9)                                   | 99.6 (97.5)                      | 99.9 (99.7)                                   | 98.9 (92.7)                                | 99.7 (99.5)                                   | 99.7 (99.0)                                   |
| R <sub>sym</sub> (%) <sup>3</sup>     | 6.55 (71.2)                                   | 7.11 (67.3)                      | 8.73 (63.1)                                   | 9.62 (69.3)                                | 9.94 (77.1)                                   | 9.44 (67.1)                                   |
| Average I/σ(I)                        | 13.6 (1.6)                                    | 10.7 (1.5)                       | 9.7 (1.5)                                     | 22.3 (1.5)                                 | 10.5 (1.6)                                    | 10.9 (1.5)                                    |
| Wilson B value (Å <sup>2</sup> )      | 27.9                                          | 38.5                             | 42.6                                          | 48.3                                       | 22.4                                          | 32.0                                          |
| Refinement                            | 49.26-1.51                                    | 48.49-1.90                       | 47.3-1.82                                     | 45.2-2.25                                  | 42.0-1.40                                     | 43.7-1.80                                     |
| Resolution range (Å)                  | (1.55-1.51)                                   | (1.95-1.90)                      | (1.86-1.82)                                   | (2.31-2.25)                                | (1.49-1.40)                                   | (1.85-1.80)                                   |
| R <sub>cryst</sub> (%) <sup>3,4</sup> | 19.0 (36.4)                                   | 18.9 (28.9)                      | 19.0 (38.3)                                   | 18.1 (32.5)                                | 14.0 (31.4)                                   | 18.0 (32.0)                                   |
| R <sub>free</sub> (%) <sup>3,4</sup>  | 21.5 (39.1)                                   | 23.8 (33.3)                      | 22.5 (37.9)                                   | 24.1 (43.3)                                | 17.0 (34.9)                                   | 21.2 (32.5)                                   |
| # of residues / waters                | 622 / 547                                     | 311 / 185                        | 622 / 52                                      | 620 / 180                                  | 310 / 273                                     | 620 / 514                                     |
| rmsd Bonds / Angles (Å/°)             | 0.012 / 1.38                                  | 0.011 / 1.51                     | 0.006 / 1.00                                  | 0.011 / 1.42                               | 0.010 / 1.36                                  | 0.012 / 1.36                                  |
| Ramachandran plot (%) <sup>5</sup>    | 96.7 / 2.9 /<br>0.4                           | 96.5 / 2.8 /<br>0.7              | 93.0 / 6.3 /<br>0.7                           | 97.2 / 2.8 /<br>0                          | 97.2 / 2.8 /<br>0                             | 96.7 / 2.9 /<br>0.4                           |
| Mean B value (Å <sup>2</sup> )        | 27.5                                          | 39.0                             | 37.5                                          | 51.0                                       | 19.3                                          | 28.5                                          |
| Chain A (chymase)                     | 25.3                                          | 37.5                             | 35.4                                          | 30.2 <sup>5</sup>                          | 18.0                                          | 25.2                                          |
| Chain C (fynomer)                     | 25.4                                          | 41.9                             | 45.7                                          | 26.6 <sup>5</sup>                          | 18.9                                          | 25.3                                          |
| Chain B (chymase)                     | 29.7                                          |                                  | 36.5                                          | 31.9 <sup>5</sup>                          |                                               | 29.7                                          |
| Chain D (fynomer)                     | 27.2                                          |                                  | 41.5                                          | 30.9 <sup>5</sup>                          |                                               | 27.2                                          |

**Table S1**

**Data collection, analysis and structure refinement.** <sup>1)</sup> Values in parentheses correspond to the highest resolution shell. <sup>2)</sup> R-factor definitions as collected in Einspahr, H. M. & Weiss, M. S. (2011). *International Tables for Crystallography Vol. F, Crystallography of Biological Macromolecules, 2nd ed.* 64-74. <sup>3)</sup> R<sub>free</sub> is R<sub>cryst</sub> with 5% of test set structure factors. <sup>4)</sup> The percentage of amino acid residues in preferred regions, allowed regions and outliers as calculated in Coot (Emsley, P. & Cowtan, K.

(2004). Coot: model-building tools for molecular graphics. *Acta Crystallogr., Sect. D: Biol. Crystallogr.* **D60**, 2126-2132). <sup>5)</sup> Without TLS component.

| Primer | Sequence (5'- 3')                                                                                      |
|--------|--------------------------------------------------------------------------------------------------------|
| 1.ba   | GAA AAG TGC CAC CTG ACG TCT AA                                                                         |
| 14.fo  | TTC TCC TTT GTG AAA ACT CAG GTC MNN MNN MNN MNN MNN<br>MNN ATA GTC ATA AAG GGC CAC AAA GAG             |
| 16.fo  | GGA GCG GGC TTC CCA CCA ATC TCC MNN MNN MNN MNN MNN<br>MNN CAA TAT TTG AAA TTT TTC TCC TTT             |
| 67.fo  | GGA GCG GGC TTC CCA CCA ATC TCC MNN MNN MNN MNN MNN<br>CAA TAT TTG AAA TTT TTC TCC TTT                 |
| 68.fo  | GGA GCG GGC TTC CCA CCA ATC TCC MNN MNN MNN MNN CAA<br>TAT TTG AAA TTT TTC TCC TTT                     |
| 13.ba  | GAC CTG AGT TTT CAC AAA GGA GAA                                                                        |
| 15.ba  | GGA GAT TGG TGG GAA GCC CGC T                                                                          |
| 2.fo   | CGG TCT GGT TAT AGG TAC ATT GAG C                                                                      |
| 60.fo  | TTC TCC TTT GTG AAA ACT CAG GTC MNN MNN MNN MNN MNN<br>MNN CCG AGC TTC ATA GTC ATA AAG GGC CAC AAA GAG |
| 65 fo  | TTC TCC TTT GTG AAA ACT CAG GTC MNN MNN MNN MNN CCG<br>AGC TTC ATA GTC ATA AAG GGC CAC AAA GAG         |
| 66.fo  | TTC TCC TTT GTG AAA ACT CAG GTC MNN MNN MNN MNN CCG<br>AGC TTC ATA GTC ATA AAG GGC CAC AAA GAG         |
| 69.fo  | TTT TTC TCC TTT GTG AAA ACT CAG MNN MNN MNN MNN MNN<br>MNN MNN TGC TTC ATA GTC ATA AAG GGC CAC AAA GAG |
| 70.fo  | TTT TTC TCC TTT GTG AAA ACT CAG MNN MNN MNN MNN MNN<br>MNN TGC TTC ATA GTC ATA AAG GGC CAC AAA GAG     |
| 71.fo  | TTT TTC TCC TTT GTG AAA ACT CAG MNN MNN MNN MNN MNN<br>TGC TTC ATA GTC ATA AAG GGC CAC AAA GAG         |
| 72.ba  | CTG AGT TTT CAC AAA GGA GAA AAA                                                                        |
| 73.fo  | CC AGT TGT CAA GGA GCG GGC TTC CCA MNN MNN TCC TTC<br>CGA GCT GTT CAA TA                               |
| 33.ba  | GCC CGC TCC TTG ACA ACT GGA GAG ACA GGT NNK ATT CCC<br>AGC AAT                                         |
| 20b.ba | CAT GCC ATG GGC GGA GTG ACA CTC TTT GTG GCC CTT TAT                                                    |
| 21.fo  | TTT TCC TTT TGC GGC CGC CTG GAT AGA GTC AAC TGG AGC<br>CAC ATA                                         |

**Table S2**

**Primers used for cloning the naïve Fynomer libraries.**
